# Supplementary material for: Self-assembly behaviours of primitive and modern lipid membrane solutions: a coarse-grained molecular simulation study
Source: Royal Society of Chemistry journal article supplement (doi:10.1039/c6cp02380k), 2016-01-01
Supplement: c6cp02380k1.pdf [file c6cp02380k1.pdf]

## Supporting Information –

### Self-assembly behaviours of primitive and modern lipid membrane solutions: a coarse-grained molecular simulation study

Noriyoshi Arai, Yuki Yoshimoto, Kenji Yasuoka, and Toshikazu Ebisuzaki

#### Morphological phase depending on the size of simulation box

Figure S1 shows that the box-size dependence of our simulations. The vertical axis is the simulational concentration ( $C$ ) of the oleic acid when the bilayer membrane and the budding from bi-layer are formed at  $1.0 k_B T$ , and the horizontal axis is the length ( $L$ ) of a side of cubic simulation box on double-log scale. In both cases,  $C$  decreases exponentially with increasing  $L$ . The data are fitted to  $C(L) = A \cdot L^B$ , where  $A$  and  $B$  are constant. As a result,  $A$  and  $B$  were 117 and -0.58 in the bilayer morphology, and 130 and -0.52 in the budding from bilayer morphology, respectively. Fitting curves are almost similar, but the budding morphology has a loose curve. We estimated the concentration with an actual size by those curves.

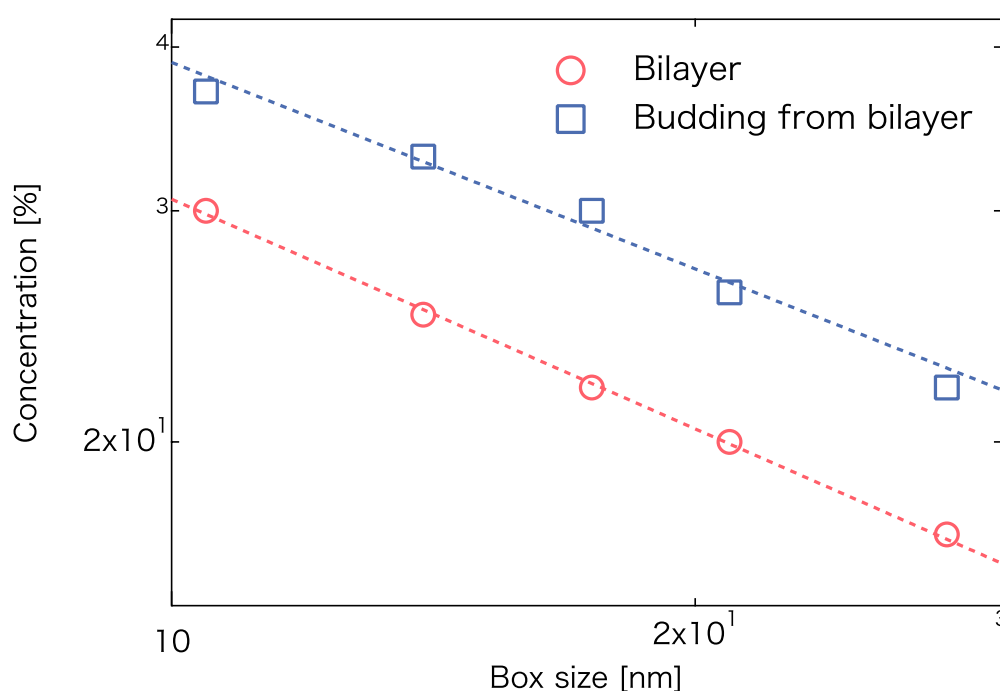

Fig. S1 The simulation box size dependence for the formations of bilayer and budding bilayer

**Area density of the membrane depending on the size of simulation box**

Figure S2 shows that the area density of the membrane depends on the simulation box-size. The vertical axis is the area density of the membrane ( $\rho_a$ ), and the horizontal axis is the length ( $L$ ) of a side of cubic simulation box on double-log scale. The area density increases exponentially with increasing  $L$ . The data is fit to  $\rho_a(L) = A \cdot L^B$ ; the constants  $A$  and  $B$  were 2.50 and 0.42, respectively.

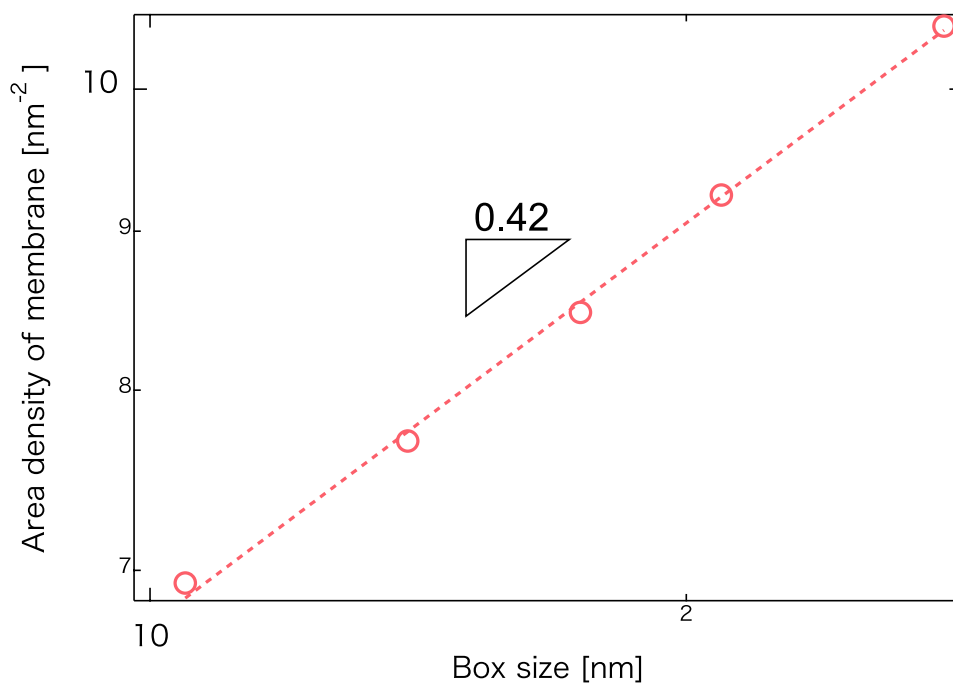

Fig. S2 The simulation box size dependence for the area density of the membrane
